# Supplementary material
Source: Springer Nature journal article supplement (https://www.springermedizin.de/resource/supplementary/12879_2012_2258_MOESM3_ESM.pdf/9445468)

Men Women Overall

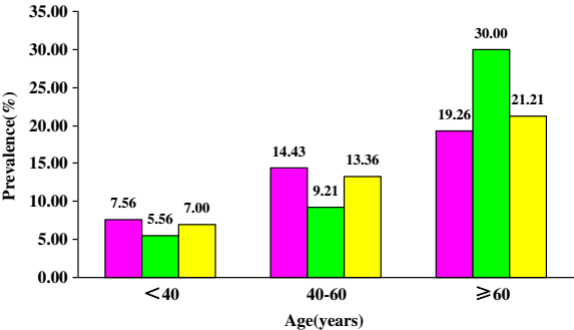

Supplement: MOESM3 [file 9445468]
